# Supplementary material
Source: PubMed Central journal article supplement (PMC2383954)
Supplement: 0802547105_Supplemental_PDF.pdf [file 0802547105_Supplemental_PDF.pdf]

# Supporting Information

Robledo *et al.* 10.1073/pnas.0802547105

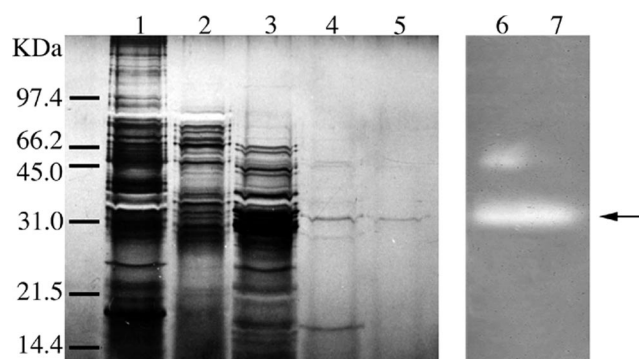

**Fig. S1.** SDS/PAGE of fractions at various steps in the purification of CelC2 cellulase made by *R. leguminosarum* bv. *trifolii* ANU843. Silver staining (lanes 1–5) and zymogram (lanes 6 and 7). Lanes: 1 and 6, sonicated extract; lane 2, DEAE Sepharose; lane 3, Sephacryl S-100; lane 4, Mono Q; lanes 5 and 7, Phenyl Superose. The molecular masses of protein standards are indicated on the left. The position corresponding to CelC2 cellulase is indicated with an arrow.

**TNILSYASLLVVFVLLIGVTTSTMLKKLGRSMRRWRALLLAASVAVAPGLPA  
TAQQAMINADAWSAYKAKFLDPSGRIVDNGNGNISHSEGQGYGLLLAYLSA  
SPADFEQIWYFTRTELLLRDDGLAVWKWDPNVKPHVADTNNATDGDMLIA  
YALALAGTAWKREDYILAASRMAQALLAETVGSSQGRITLLMPGTEGFTGS  
DRDDGPVNVPSYWIYE AIPVMAALAPSDAWKKLSDDGVELLKTMQFGPRK  
LPAEWVSLHDKPRPAEGFDAEFGYNAIRIPLYLARGGITDKALLVRLQKGM  
SQDGVPATIDLTTGRPKTVLSDPGYRIVNDVVACVVDGTRLPSSALQFAPAL  
YYPSTLQLLGLAYIGEKGHPECL**

**Fig. S2.** *In silico* amino acid sequence analysis of translated product obtained by DNA amplification of *R. leguminosarum* bv. trifolii ANU843 using CelCexF and C2R primers. Brown, CelB C terminus; blue, CelC2 Sec leader signal peptide; red, GH8 glycosyl hydrolase catalytic center; green, BamHI–HindIII deletion fragment; underlined, the internal sequence that is identical to the isolated internal tryptic peptide obtained from the purified enzyme. More comments on the CelC2 signal peptide: This 23-aa peptide has the three distinct regions of the signal peptide used in the general secretory (Sec) pathway in Gram-negative bacteria. These include a positively charged N-terminal region (n-region), a hydrophobic  $\alpha$  helical region (h-region), and a c-domain that contains the site of cleavage by the signal peptidase. The signal peptides for the Tat secretory pathway have a similar tripartite organization, but they also have a conserved sequence motif (S/T)-R-R-x-F-L-K containing the invariantly consecutive arginine residues (R) not found in CelC2.

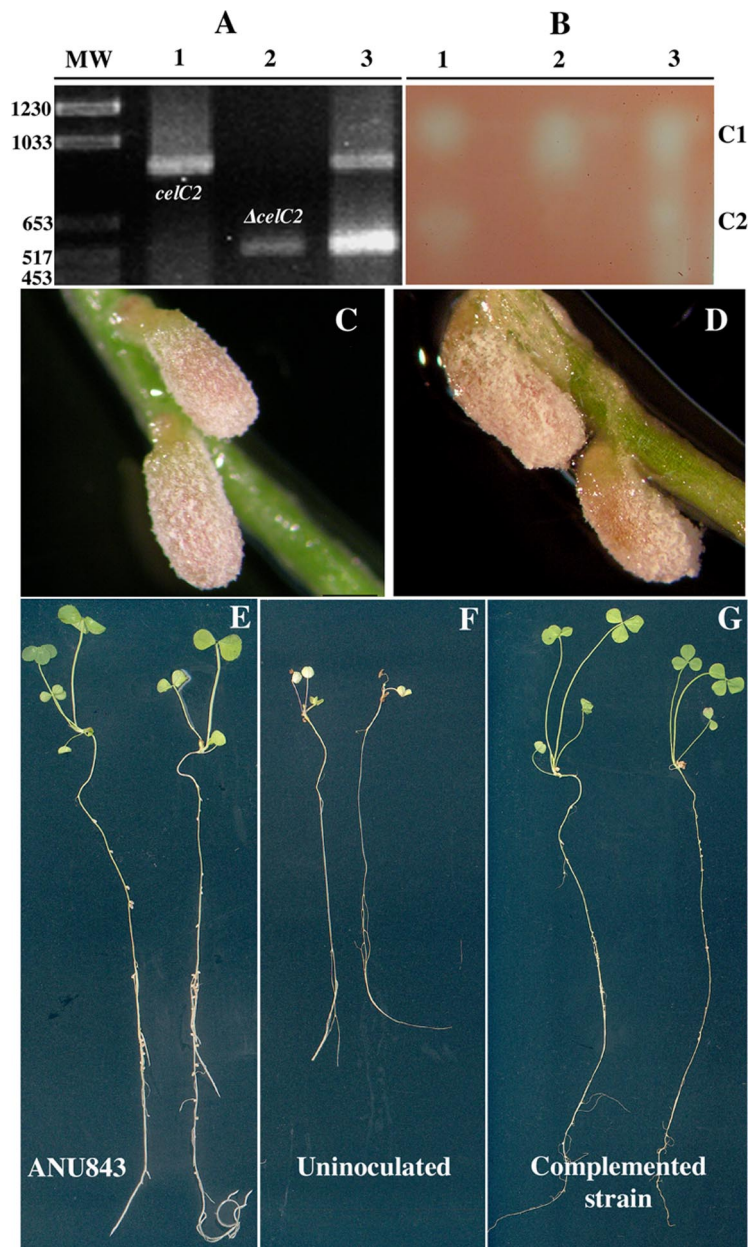

**Fig. S3.** Analysis of the *ce/C2*-complemented strain. (A and B) PCR amplification of DNA using primers C1F/C2R (A) and zymogram of CM-cellulase isozymes in sonicated cell extracts (B) from *R. leguminosarum* bv trifolii ANU843 wt (lanes 1), ANU843 $\Delta$ *ce/C2* (lanes 2), and *ce/C2* complemented strain (lanes 3). PCR products were analyzed by electrophoresis on a 1% agarose gel. MW, DNA molecular weight marker; fragment lengths in base pairs are indicated. (C–G) Typical nodules and whole phenotypes of white clover plants 40 days after inoculation with the wild-type ANU843 (C and E) or the *ce/C2*-complemented strain (D and G) and uninoculated plants (F).

**Table S1. Cellulase production by representative type strains of root-nodule legume symbionts**

| Genus                  | Type strain                                      | Nodulated legume host | Cellulase production* |
|------------------------|--------------------------------------------------|-----------------------|-----------------------|
| <i>Rhizobium</i>       | <i>R. etli</i> CFN 42 <sup>T</sup>               | <i>Phaseolus</i>      | +                     |
|                        | <i>R. galegae</i> ATCC 43677 <sup>T</sup>        | <i>Galega</i>         | +                     |
|                        | <i>R. gallicum</i> R602 sp <sup>T</sup>          | <i>Phaseolus</i>      | +                     |
|                        | <i>R. giardinii</i> H152 <sup>T</sup>            | <i>Phaseolus</i>      | +                     |
|                        | <i>R. hainanense</i> I66 <sup>T</sup>            | <i>Desmodium</i>      | +                     |
|                        | <i>R. huautlense</i> SO2 <sup>T</sup>            | <i>Sesbania</i>       | +                     |
|                        | <i>R. indigoferae</i> CCBAU 71042 <sup>T</sup>   | <i>Indigofera</i>     | +                     |
|                        | <i>R. leguminosarum</i> ATCC10004 <sup>T</sup>   | <i>Pisum</i>          | +                     |
|                        | <i>R. loessense</i> CCBAU 7190B <sup>T</sup>     | <i>Astragalus</i>     | +                     |
|                        | <i>R. lusitanum</i> P1-7 <sup>T</sup>            | <i>Phaseolus</i>      | +                     |
|                        | <i>R. mongolense</i> USDA 1844 <sup>T</sup>      | <i>Medicago</i>       | +                     |
|                        | <i>R. sullae</i> IS123 <sup>T</sup>              | <i>Hedysarum</i>      | +                     |
|                        | <i>R. tropici</i> CIAT 899 <sup>T</sup>          | <i>Phaseolus</i>      | +                     |
|                        | <i>R. yanglingense</i> CCBAU 71623               | <i>Amphicarpaea</i>   | +                     |
|                        | <i>R. cellulosilyticum</i> ALA10B2 <sup>T</sup>  | <i>Medicago</i>       | +                     |
| <i>Sinorhizobium</i>   | <i>R. undicola</i> LMG 11875 <sup>T</sup>        | <i>Neptunia</i>       | +                     |
|                        | <i>S. arboris</i> LMG 14919 <sup>T</sup>         | <i>Acacia</i>         | +                     |
|                        | <i>S. fredii</i> LMG 6217 <sup>T</sup>           | <i>Glycine</i>        | +                     |
|                        | <i>S. kostiense</i> LMG 19227 <sup>T</sup>       | <i>Acacia</i>         | +                     |
|                        | <i>S. meliloti</i> ATCC 9930 <sup>T</sup>        | <i>Medicago</i>       | +                     |
|                        | <i>S. medicae</i> LMG1037 <sup>T</sup>           | <i>Medicago</i>       | +                     |
|                        | <i>S. sahelii</i> LMG7837 <sup>T</sup>           | <i>Acacia</i>         | +                     |
|                        | <i>S. terangae</i> LMG6463 <sup>T</sup>          | <i>Acacia</i>         | +                     |
| <i>Mesorhizobium</i>   | <i>S. xinjiangense</i> LMG17930 <sup>T</sup>     | <i>Glycine</i>        | +                     |
|                        | <i>M. amorphae</i> ACCC 19665 <sup>T</sup>       | <i>Amorpha</i>        | +                     |
|                        | <i>M. chacoense</i> Pr5 <sup>T</sup>             | <i>Prosopis</i>       | w                     |
|                        | <i>M. ciceri</i> USDA 3383 <sup>T</sup>          | <i>Cicer</i>          | +                     |
|                        | <i>M. huakuii</i> USDA 4779 <sup>T</sup>         | <i>Astragalus</i>     | +                     |
|                        | <i>M. loti</i> ATCC 33669 <sup>T</sup>           | <i>Lotus</i>          | +                     |
|                        | <i>M. mediterraneum</i> USDA 3392 <sup>T</sup>   | <i>Cicer</i>          | +                     |
|                        | <i>M. plurifarium</i> LMG 7836 <sup>T</sup>      | <i>Acacia</i>         | +                     |
|                        | <i>M. septentrionale</i> HAMB1 2582 <sup>T</sup> | <i>Astragalus</i>     | +                     |
|                        | <i>M. tianshanense</i> LMG 18976 <sup>T</sup>    | <i>Sophora</i>        | +                     |
| <i>Phyllobacterium</i> | <i>M. temperatum</i> HAMB1 2583 <sup>T</sup>     | <i>Astragalus</i>     | +                     |
|                        | <i>P. trifolii</i> pETPO2 <sup>T</sup>           | <i>Trifolium</i>      | +                     |
| <i>Bradyrhizobium</i>  | <i>B. canariense</i> BTA1 <sup>T</sup>           | <i>Chamaecytisus</i>  | w                     |
|                        | <i>B. elkanii</i> LMG 6134 <sup>T</sup>          | <i>Glycine</i>        | +                     |
|                        | <i>B. japonicum</i> LMG 6138 <sup>T</sup>        | <i>Glycine</i>        | +                     |
|                        | <i>B. liaoningense</i> LMG 18230 <sup>T</sup>    | <i>Glycine</i>        | w                     |
|                        | <i>B. yuanmingense</i> LMG 21827 <sup>T</sup>    | <i>Lespedeza</i>      | w                     |
| <i>Azorhizobium</i>    | <i>A. caulinodans</i> ORS 571 <sup>T</sup>       | <i>Sesbania</i>       | +                     |
| <i>Devosia</i>         | <i>D. neptuniae</i> J1 <sup>T</sup>              | <i>Neptunia</i>       | w                     |

+, positive; w, weakly positive.

\*Detected by the double-layer plate assay.

**Table S2. Putative rhizobial cellulase genes**

| Rhizobia                                | Locus tag*  | Glycosyl hydrolase family |
|-----------------------------------------|-------------|---------------------------|
| <i>R. leguminosarum</i> 3841            | RL1648      | GH 8                      |
|                                         | RL0081      | GH 26                     |
| <i>R. etli</i> CFN42 <sup>T</sup>       | RHE_CH01544 | GH 8                      |
|                                         | RHE_CH00072 | GH 26                     |
| <i>Sinorhizobium medicae</i> WSM419     | Smed_5210   | GH 8                      |
|                                         | Smed_3669   | GH 26                     |
| <i>Sinorhizobium meliloti</i> 1021      | SMb20462    | GH 26                     |
| <i>Mesorhizobium loti</i> MAFF33099     | mll7872     | GH 26                     |
|                                         | mlr2086     | GH 5                      |
| <i>Bradyrhizobium japonicum</i> USDA110 | blr3367     | GH 5                      |

\*Data from GenBank.

**Table S3. Symbiotic phenotypes in white clover after inoculation with wild-type ANU843 or the CelC2 cellulase<sup>-</sup> mutant derivative  $\Delta ce/C2$**

| Inoculant strain | Symbiotic phenotypes on white clover seedlings |     |                             |                             |                                           |
|------------------|------------------------------------------------|-----|-----------------------------|-----------------------------|-------------------------------------------|
|                  | Noi + Nod plant <sup>-1</sup>                  | Had | Hac per plant <sup>-1</sup> | Inf per plant <sup>-1</sup> | Shoot length per plant <sup>-1</sup> , cm |
| ANU843wt         | 10.8 <sup>a</sup> ± 5.2                        | +   | 16.8 ± 1.7                  | 13.8 ± 1.7                  | 5.2 <sup>b</sup> ± 3.1                    |
| $\Delta ce/C2$   | 12.0 <sup>a</sup> ± 5.8                        | +   | 0 ± 0                       | 0 ± 0                       | 3.0 <sup>a</sup> ± 1.4                    |
| Uninoculated     | 0 ± 0                                          | -   | 0 ± 0                       | 0 ± 0                       | 3.0 <sup>a</sup> ± 0.6                    |

The results reported are the mean ± SD of at least 4 (Had, Hac, Inf) or 20 (Noi + Nod, Shoot length) replicate samples per treatment. Phenotype designations are Noi (nodule primordia), Nod (emerged nodules), Had (moderate root hair deformations), Hac (marked curling of root hairs, the so-called "shepherd's crook"), and Inf (infection-thread formation within root hairs). Values followed by the same letter (a or b) are not significantly different from each other at  $P = 0.01$  according to Fisher's Protected LSD (least-significant differences) test statistic.
